# Supplementary material for: The role and evolutionary pathway of spin states in CoFe Prussian blue analogues for photo-assisted water oxidation electrocatalysis
Source: Royal Society of Chemistry journal article supplement (doi:10.1039/d4tc05474a), 2025-01-01
Supplement: d4tc05474a1.pdf [file d4tc05474a1.pdf]

## Supporting Information

### **The Role and Evolutionary Pathway of Spin States in CoFe Prussian blue analogue for Photo-Assisted Water Oxidation Electrocatalysis**

Dujie Feng,<sup>a</sup> Yi Zhou,<sup>\*a</sup> Wanhong He,<sup>\*a</sup> Jin Zhang,<sup>b</sup> Guihua Huang,<sup>a</sup> Yiming Shao<sup>a</sup>

<sup>a</sup>School of Chemistry and Chemical Engineering, Changsha University of Science and Technology, Changsha 410114, P. R. China. E-mail: 008639@csust.edu.cn

<sup>b</sup>School of Traffic and Transportation Engineering, Changsha University of Science and Technology, Changsha 410114, P. R. China.

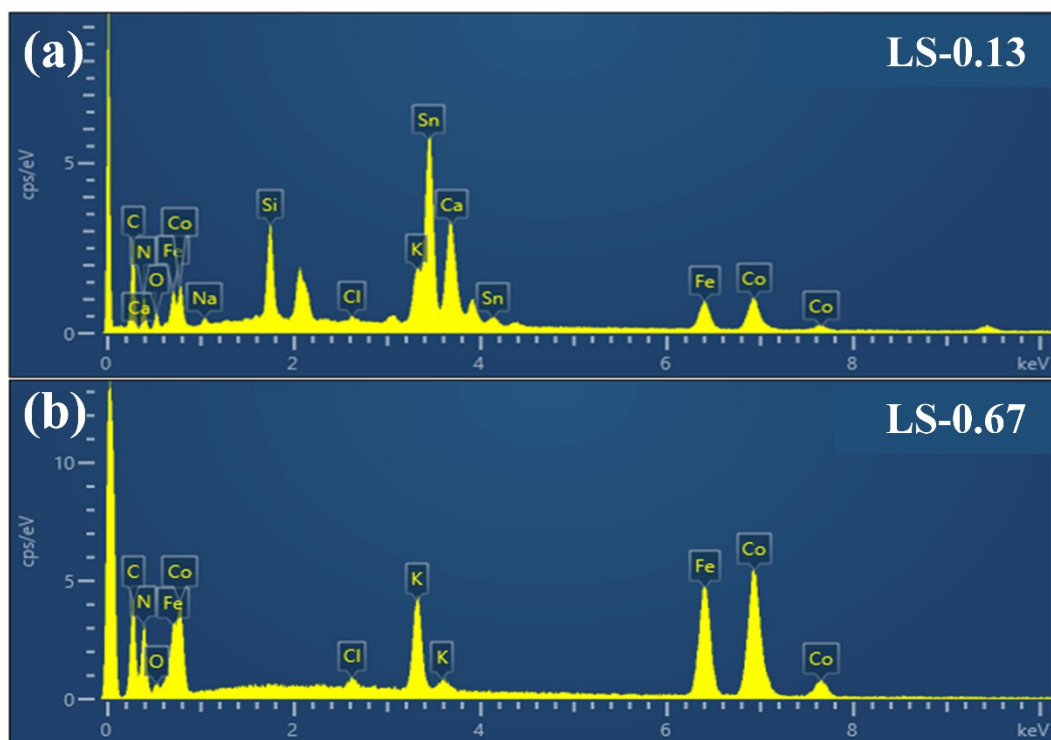

**Fig. S1.** The EDS profiles of LS-0.13 and LS-0.67.

**Table S1.** The lattice constant obtained through the Bragg equation

| Sample       | Lattice constant ( $\text{\AA}$ ) |
|--------------|-----------------------------------|
| LS-0.13      | 9.9051 $\pm$ 0.0097               |
| LS-0.13-Used | 9.8742 $\pm$ 0.0036               |
| LS-0.67      | 9.8633 $\pm$ 0.0089               |
| LS-0.67-Used | 9.8583 $\pm$ 0.0028               |

**Table S2.** Results of deconvolution of the vibration absorptions of the CN groups for CoFe PBAs.

| Sample       | The corresponding spin state              | Average center of the peak | The molar ratio of the corresponding spin state |
|--------------|-------------------------------------------|----------------------------|-------------------------------------------------|
| LS-0.13      | LS Co <sup>III</sup> -NC-Fe <sup>II</sup> | 2115.0                     | 13.56%                                          |
|              | Co <sup>II</sup> -NC-Fe <sup>II</sup>     | 2090.0                     | 86.44%                                          |
| LS-0.13-Used | LS Co <sup>III</sup> -NC-Fe <sup>II</sup> | 2123.8                     | 33.19%                                          |
|              | Co <sup>II</sup> -NC-Fe <sup>II</sup>     | 2077.6                     | 66.81%                                          |
| LS-0.67      | LS Co <sup>III</sup> -NC-Fe <sup>II</sup> | 2120.7                     | 67.27%                                          |
|              | Co <sup>II</sup> -NC-Fe <sup>II</sup>     | 2086.5                     | 32.73%                                          |
| LS-0.67-Used | LS Co <sup>III</sup> -NC-Fe <sup>II</sup> | 2117.3                     | 30.38%                                          |
|              | Co <sup>II</sup> -NC-Fe <sup>II</sup>     | 2086.5                     | 69.62%                                          |

**Table S3.** The peak information and molar percentages of ions with different oxidation states derived from XPS analysis.

| Element          |                    | Fe 2p <sub>3/2</sub> |                  |       | Fe 2p <sub>1/2</sub> |                  |       | Co 2p <sub>3/2</sub> |                  |       | Co 2p <sub>1/2</sub> |                  |                  |       |         |
|------------------|--------------------|----------------------|------------------|-------|----------------------|------------------|-------|----------------------|------------------|-------|----------------------|------------------|------------------|-------|---------|
|                  |                    | Fe <sup>2+</sup>     | Fe <sup>3+</sup> | sat.  | Fe <sup>2+</sup>     | Fe <sup>3+</sup> | sat.  | Co <sup>3+</sup>     | Co <sup>2+</sup> | sat.  | LM<br>M              | Co <sup>3+</sup> | Co <sup>2+</sup> | sat.  | LM<br>M |
| LS-0.13          | Peak position (eV) | 708.6                | 709.9            | 711.5 | 721.4                | 722.7            | 724.2 | 780.5                | 782.6            | 785.8 | 789.2                | 795.7            | 797.8            | 800.8 | 804.3   |
|                  | molar percentage   | 46.5                 | 13.1             | 4.5   | 23.2                 | 6.6              | 6.1   | 5.1                  | 39.7             | 13.8  | 9                    | 2.6              | 19.8             | 6.2   | 3.8     |
|                  | e (%)              |                      |                  |       |                      |                  |       |                      |                  |       |                      |                  |                  |       |         |
|                  |                    |                      |                  |       |                      |                  |       |                      |                  |       |                      |                  |                  |       |         |
| LS-0.13-<br>Used | Peak position (eV) | 708.6                | 709.9            | 712   | 721.4                | 722.7            | 724.1 | 780.8                | 782.6            | 785.1 | 788.5                | 795.5            | 797.6            | 799.4 | 802.2   |
|                  | molar percentage   | 49.9                 | 11.6             | 2     | 24.9                 | 5.8              | 5.8   | 7.9                  | 38.8             | 13.5  | 8.1                  | 4                | 19.4             | 6     | 2.3     |
|                  | e (%)              |                      |                  |       |                      |                  |       |                      |                  |       |                      |                  |                  |       |         |
|                  |                    |                      |                  |       |                      |                  |       |                      |                  |       |                      |                  |                  |       |         |
| LS-0.67          | Peak position (eV) | 708.5                | 709.7            | 711.8 | 721.3                | 722.6            | 723.9 | 780.6                | 782.6            | 785.6 | 789.1                | 795.8            | 797.8            | 800.4 | 804.5   |
|                  | molar percentage   | 53.4                 | 7.9              | 2.1   | 26.7                 | 4                | 6     | 14.9                 | 33.6             | 12.4  | 8.7                  | 7.4              | 16.8             | 4     | 2.2     |
|                  | e (%)              |                      |                  |       |                      |                  |       |                      |                  |       |                      |                  |                  |       |         |
|                  |                    |                      |                  |       |                      |                  |       |                      |                  |       |                      |                  |                  |       |         |
| LS-0.67-<br>Used | Peak position (eV) | 708.5                | 710              | 711.8 | 721.3                | 722.8            | 724.2 | 780.8                | 782.6            | 785.6 | 788.8                | 795              | 797.6            | 800.1 | 803.6   |
|                  | molar percentage   | 46.4                 | 11.4             | 6.5   | 23.2                 | 5.7              | 6.8   | 7.4                  | 36.3             | 14.8  | 9.7                  | 3.7              | 18.2             | 6.4   | 3.5     |
|                  | e (%)              |                      |                  |       |                      |                  |       |                      |                  |       |                      |                  |                  |       |         |
|                  |                    |                      |                  |       |                      |                  |       |                      |                  |       |                      |                  |                  |       |         |

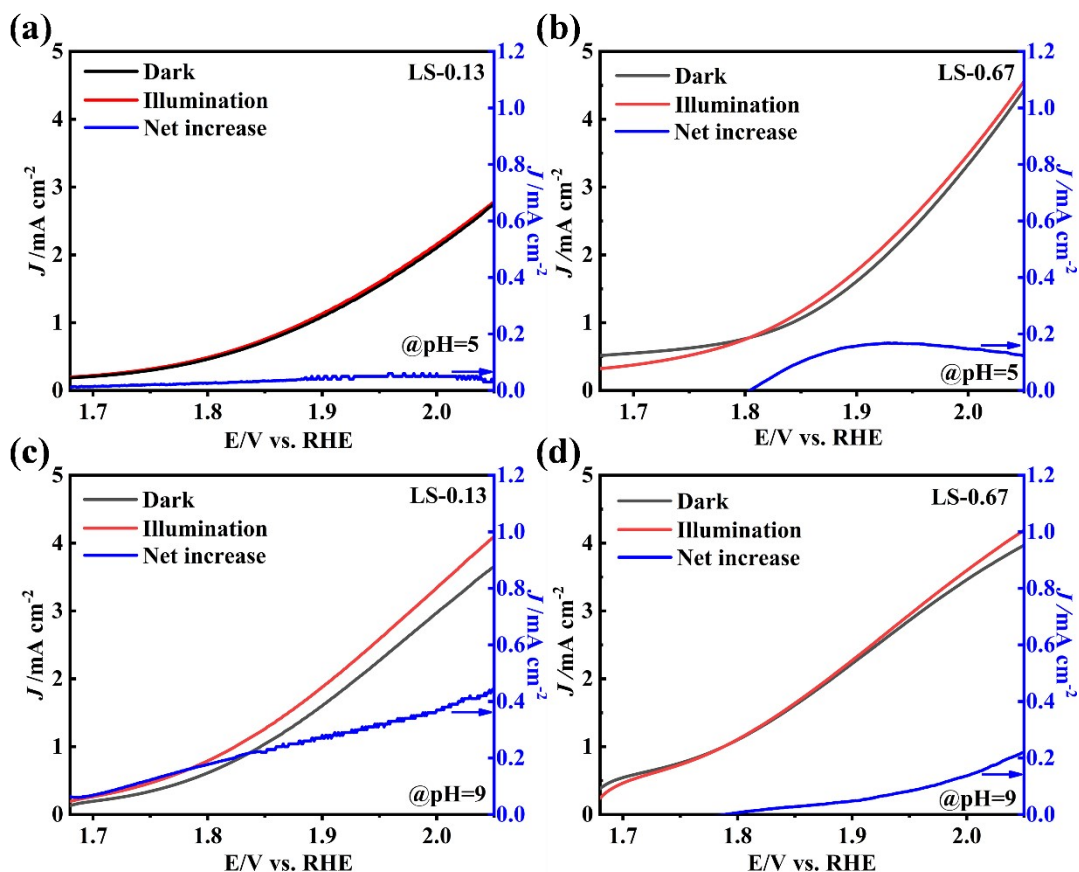

**Fig. S2** LSV curves and net photocurrent density for (a, c) LS-0.13 and (b, d) LS-0.67 at different pH values.

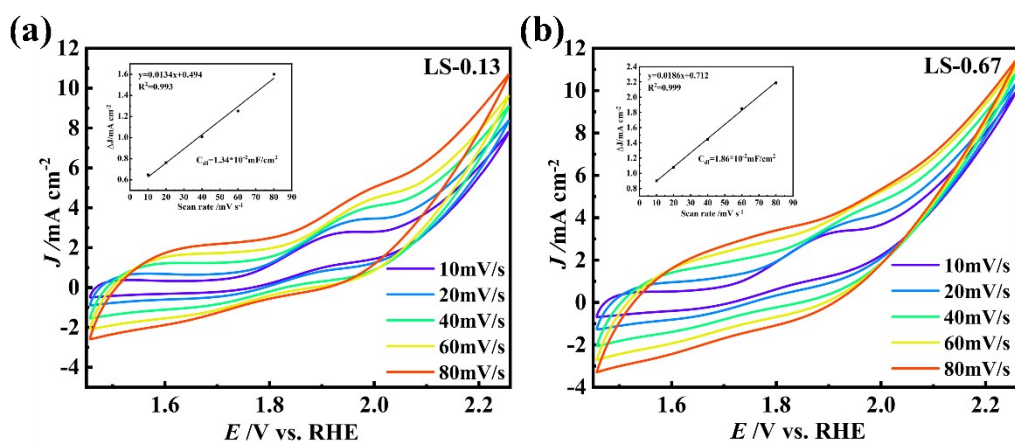

**Fig. S3.** Cyclic voltammograms and double-layer capacitance plots of (a) LS-0.13 and (b) LS-0.67 at different scan rates in a 0.1 M KPi + 1 M KNO<sub>3</sub> electrolyte at pH=7.

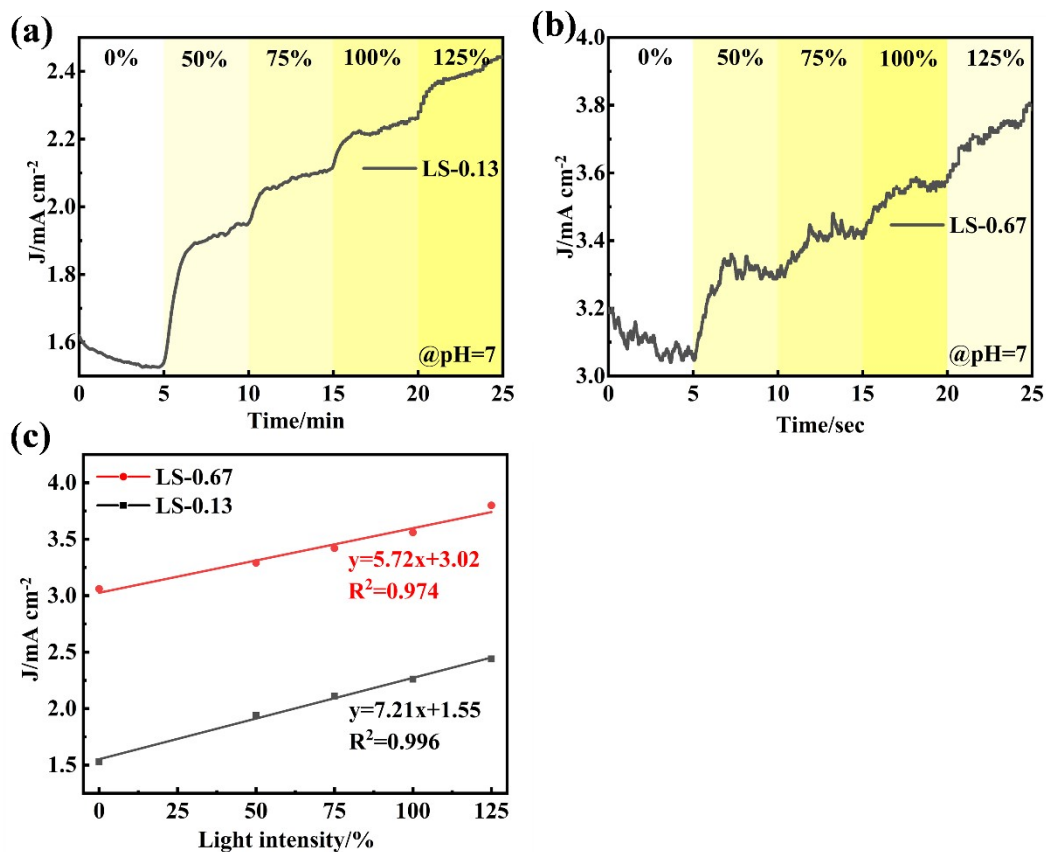

**Fig. S4.** The CA curves of (a) LS-0.13 and (b) LS-0.67 under a constant voltage of 2.0 V vs. RHE, with increasing light intensity at an interval of 300 s. (c) The linear relationship between light intensity and current density.

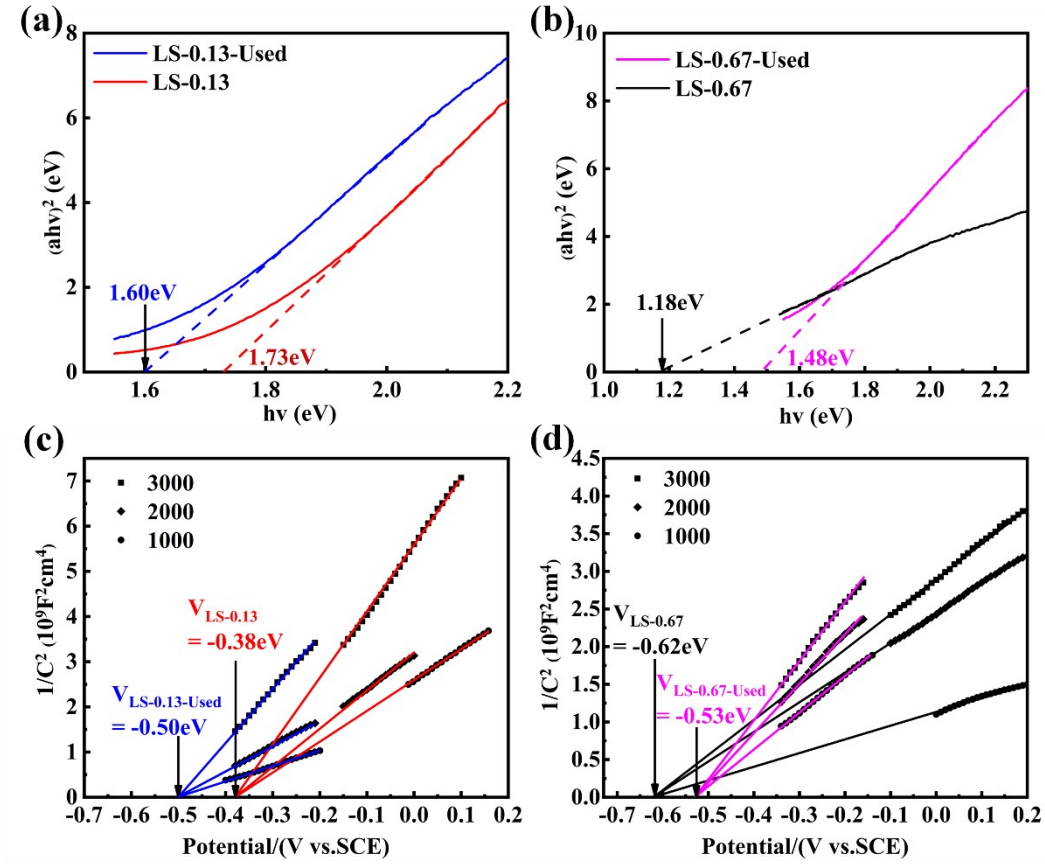

**Fig. S5.** (a, b) Energy band gap and (c, d) Mott-Schottky plots of CoFe PBAs with different LS ratio pre- and post-photo-assisted OER process.

**Table S4.** The band structure data of CoFe PBAs.

| Sample       | $E_g$ | $V_{fb}$ vs. SCE | $V_{fb}$ vs. RHE | $E_{CB}$ | $E_{VB}$ |
|--------------|-------|------------------|------------------|----------|----------|
| LS-0.13      | 1.73  | -0.38            | 0.28             | 0.18     | 1.91     |
| LS-0.13-Used | 1.60  | -0.50            | 0.16             | 0.06     | 1.66     |
| LS-0.67      | 1.18  | -0.62            | 0.04             | -0.06    | 1.12     |
| LS-0.67-Used | 1.48  | -0.53            | 0.13             | 0.03     | 1.51     |

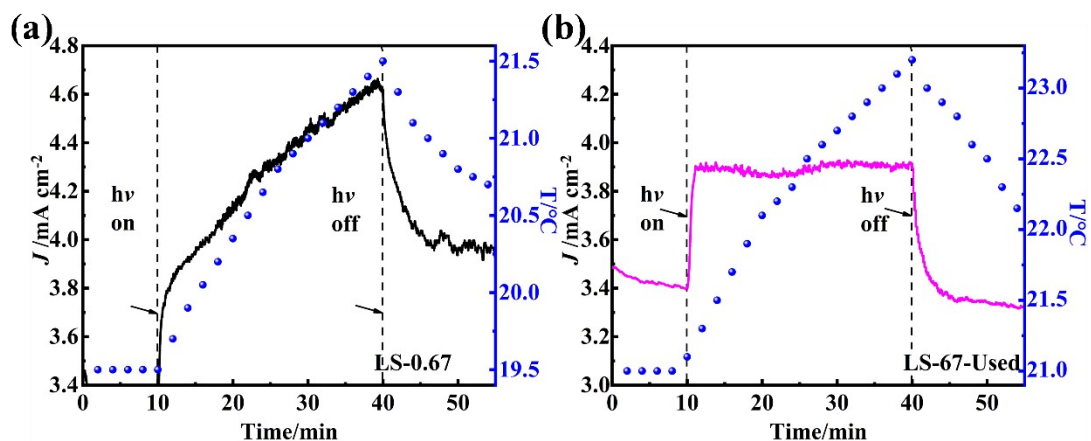

**Fig. S6.** Comparison of the change of temperature and the current density profiles for (a) LS-0.67 and (b) LS-0.67-Used. The measurements were conducted at 2.0 V vs. RHE, in a 0.1 M KPi + 1 M KNO<sub>3</sub> electrolyte at pH 7. The electrodes were irradiated by a 100 mW·cm<sup>-2</sup> Xenon light for 30 min. For both as-prepared LS-0.67 and LS-0.67-Used, the changes in the temperature-time curve and the I-t curve showed different trends. In the light-on stage, the current density of LS-0.67 increased rapidly in the very beginning, but the temperature increased gradually during the whole stage. Upon turning off the light, the current density of LS-0.67 decreased fast in the first 5 min and then decayed very slowly, while the temperature decreased approximately linearly. For LS-0.67-Used, the current density kept constantly during the light irradiation stage whereas the temperature kept increasing. After turning off the light, the current density of LS-0.67-Used dropped rapidly while the temperature decreased linearly. Thus, the experiments indicate that the thermal effect had little impact on the current density.
